# Supplementary material for: Meta-analytic evidence on the efficacy of hypnosis for mental and somatic health issues: a 20-year perspective
Source: Front Psychol. 2024 Jan 8;14:1330238. doi: 10.3389/fpsyg.2023.1330238 (PMC10807512; doi:10.3389/fpsyg.2023.1330238)
Supplement: Supplementary file 1 [file Table_1.XLSX]

## Sheet: Review characteristics
Supplementary Table 1. Detailed characteristics of the included reviews
Study ID	Author (Year)	Update	Studies	Population	Number of included studies	Number of included patients	Publication years of included studies	Language of included studies	Countries of included studies	Sources searched	Date of last search	Setting / Diagnosis/ Problem	Patients - Description of included studies	Patients - Age in Years	Patients - % female	Intervention (inclusion criteria)	Intervention - Description of included studies	Intervention - Dose/ Intensity/ Frequency/ Duration	Comparators	Quality rating	Reported harms of hypnosis	Hypnotizability considered
Medical procedures
1	Holler et al. (2021) Germany	Update of Tefikow et al. (2013)	RCTs on hypnosis only	Adults only	50	4269	1974 - 2020	English, French	North America: N = 27 Europe: N=18 Asia: N=4 Africa: N=1	MEDLINE, CENTRAL, Web of Science, PsycINFO, ProQuest Dissertation and Theses Database, manual search	2021-01-16	Patients undergoing elective surgical procedures under general anesthesia	Diagnostic procedures: N=14 Gynecological surgery: N=7 Cardiac surgery: N=8 Dental surgery: N=5 Local or regional anesthesia: N=27 General anesthesia: N=19	51	0.66	Hypnosis as an adjunct to surgical standard care, implemented pre-, intra- and/or postoperatively, provided face-to-face or as a pre-recorded tape/CD, labeled as “hypnosis” or related hypnosis-specific terms by the study authors (e.g., “hypnotherapy”, “hypnotic intervention”)	Face-to-face: i=32 Audio recordings: i=16 Both modes of presentation: i=3	Median intervention time: 30 min (IQR=15–62 min)	1) Standard care alone (defined as the standard care policy of the hospital) 2) Attention control groups (defined as providing same amount of time and attention to the patients in addition to surgical standard care)	Cochrane RoB tool 2.0	Nothing reported	Nothing reported
2	Tefikow et al. (2013) Germany		RCTs on hypnosis only	Adults only	34	2597	1974 - 2011	English, French	North America: N = 26 Europe: N=6 Africa: N=1 Australia: N=1	MEDLINE, CENTRAL, Web of Science, PsycINFO, ProQuest Dissertation and Theses Database, manual search	2011-09-30	Patients undergoing elective surgical procedures under general anesthesia or local anesteasia; burn wound debridement patients	General anesthesia: N=9 Local anesthesia: N= 19 Burn wound care without anesthesia: N=5 Mixed anesthesia: N= 1	40	60% in hypnosis group 63% in control group	Hypnosis as an adjunct to surgical standard care, implemented pre-, intra- and/or postoperatively, provided face-to-face or as a pre-recorded tape/CD, labeled as “hypnosis” or related hypnosis-specific terms by the study authors (e.g., “hypnotherapy”, “hypnotic intervention”)	Face-to-face: i=21 Audio recordings: i=9 Both modes of presentation: i=4	Brief (3-20 min): N=9 Medium (21-110 min): N=17 Intense (110-240 min): N=8	1) Standard care alone (defined as the standard care policy of the hospital) 2) Attention control groups (defined as providing same amount of time and attention to the patients in addition to surgical standard care)	Cochrane RoB tool	Nothing reported	Nothing reported
3	Kekecs et al. (2014) Hungary		RCTs on hypnosis only	Adults only	15	1028	1980 - 2008	English	Not reported	PubMed, PsycINFO, CINAHL, and ProQuest Dissertations & Theses Database	February 21, 2014	Patients undergoing surgery / surgical side effects	Coronary artery bypass surgery: N=2 Removal of third mandibular molars: N=2 Elective breast reduction surgery: N=2 Cardiopulmonary bypass surgery: N=1 First-trimester surgical abortion: N=2 Obstetric/gynecological surgery: N=1 Excisional breast biopsy / lumpectomy: N=2 Cholecystectomy: N=1 Elective gallbladder surgery: N=1 Not specified: N=1	Adults	Not reported	Therapeutic suggestions or hypnosis applied adjunct to routine surgical care	Live / Pre-surgery: N=5 Live / Pre and During: N= 2 Live / Pre and after-surgery: N=4 Recorded / pre-surgery: N=4	Not reported	1) Treatment as usual (TAU) 2) Attention control (AC)	Cochrane RoB tool	Nothing reported	Nothing reported
4	Schnur et al. (2008) USA		RCTs on hypnosis only	Children/ adolsecents and adults	19	1723	1995 - 2008	English	Not reported	PsycINFO, PubMed	February 2008	Patients undergoing medical procedures	Coronary artery bypass: N=2 Voiding cystourethrography: N=1 Lower abdominal surgery: N=1 Gynecologic surgery: N=1 Physiotherapy with burn patients: N=1 Oral surgery: N=1 Interventional radiology: N=1 Large core breast biopsy: N=1 Bone marrow aspirations: N=1 Lumbar puncture: N=2 Surgical abortion: N=1 Mixed surgery: N=1 Excisional breast biopsy: N=2 Breast conserving surgery: N=1 Ambulatory surge…	Adults: N=12 Children: N=5 Mixed: N=2	Not reported	Hypnosis as at least one of the intervention conditions	Live / Pre-surgery: N=11 Live / During surgery: N= 2 Live / Pre and During: N= 6	Not reported	1) TAU 2) AC	Orwin’s (1983) method	No side effects	Too few papers reported measures on hypnotiability, so no potential moderating effect could be found
5	Noergaard et al. (2019) Denkmark		RCTs on hypnosis only	Adults only	7 included in meta-analysis (included in review: N=10)	1231 (total: 1365)	1996 - 2015	English	Not reported	MEDLINE via PubMed, CINAHL, Scopus, Swemed+ and PsycINFO (Grey literature was searched in the following databases and websites: Mednar, ProQuest Dissertations and Theses (for international disser tations and theses), Google Scholar, Trip database, National Institute of Health's (NIH), Clinical Trials Databases, American Society of Clinical Hypnosis (ASCH), The American Board of Medical Hypnosis (…	July 2018	Patients undergoing minimally invasive procedures	First‐trimester pregnancy termination Needle myography Biopsies Tumour treatments Angiographies Ablations and skin lesion excisions	18 - 94	0.71	Hypnotic analgesia (or labelled with hypnosis‐related terms like visualisation or guided imagery) provided together with usual pain medication, provided either face to face or as a prerecorded version with out limits on the length of the intervention	Self-hypnotic realxation, visualization, attentive behavior + intravenous analgesia (Fentanyl & Midazolam): N=3 Self-hypnotic relaxation (without pain medication): N=1 Hypnotic relaxation + intravenous analgesia: N=2 Hypnotic induction with analgesic suggestion (without pain medication): N=1 Periprocedural: N=4 20min before the procedure + lasting throughout: N=2 10-20min before the procedure (no…	16 - 195 min	1) TAU + intravenous analgesia (Fentanyl & Midazolam) 2) TAU (without pain medication)	Cochrane RoB tool	Meta-analysis considered "reduction in adverse events" as an outcome in the meta-analysis. Seven studies reported data, the pooled effect was in favor of hypnosis, but non-significant (RR=0.61)	Nothing reported
6	Zeng et al. (2022) China		RCTs on hypnosis only	Adults only	8	1242	2000 - 2021	English	France: N=1 Belgium: N=2 USA: N=5	PubMed, Web of Science, Wiley online library, Elsevier databases, CNKI (the China national knowledge infrastructure), Wanfang Data	January 2022	Patients undergoing minor surgery for breast cancer under general anesthesia	Breast biopsy: N=3 Excisional breast biopsy: N=1 Tumorectomy or quadrantectomy: N=1 Lumpectomy or mastectomy: N=1 Oncologic surgery: N=1	18 - 92	1	Hypnosis before general anesthesia, no combined intervention methods	Short session before anesthesia induction: N=2 Session before anesthesia induction: N=2 Self-hypnotic relaxation exercise: N=3 15-minute pre-surgery hypnosis session: N=1	2 - 20 min	Standard care	Cochrane RoB tool 2.0	Nothing reported	Nothing reported
7	Burghardt et al. (2018) Germany		RCTs on different interventions including hypnosis	Adults only	5	255	1981 - 2011	English	Not reported	MEDLINE , CENTRAL, Web of Science, PsycINFO + ProQuest Dissertations, Theses Full Text Database	2017-08-01	Patients undergoing dental procedures under regional or general anesthesia	Dental-implant surgery: N=1 Third molar extraction: N=3 Oral surgery (elective extraction): N=1	Not reported	Not reported	Any non-pharmacological intervention which is implemented before or during dental procedures in general dental practice	Audio pillow with hypnosis text + relaxation music: N=1 Tape containing hypnotic relaxation induction: N=2 Distraction + hypnosis (contemplation of an aquarium/poster): N=1 Tape with suggestions for bleeding and edema control: N=1	66min during procedure: N=1 Daily listening for 20min, 6-8 days before procedure: N=2 Before procedure: N=2	1) TAU 2) AC (audio pillow, tape with information)	Cochrane RoB tool Version 5.1.0. (Higgins 2017)	Nothing reported	Discussed that hypnotic suggestibility might differ between different participants, but not tested specifically
8	Uman et al. (2006)		RCTs on different interventions including hypnosis	Children/ adolescents only	5	196	1987 - 2006	English	USA: N=2 Greece: N=3	Cochrane Central Register of Controlled Trials (CENTRAL), Medline, PsycINFO, Excerpta Medica dataBASE (EMBASE), Cumulative Index to Nursing and Allied Health Literature (CINAHL), and Web of Science	2005-02-01	Needle-related procedures	Bone marrow aspiration: N=3 Lumbar puncture: N=2	2016-03-01	Not reported	Not specified	Training in hypnosis and self-hypnosis from psychologist: N=1 Therapist taught hypnotic suggestion using the child’s favorite story: N=1 Hypnosis through visual imagery and analgesic suggestion, relaxation techniques: N=1 a) Direct (analgesic hypnotic suggestion) and b) Indirect (hypnotic suggestion) : N=1 a) Hypnosis (& EMLA) and b) Attention control (+ EMLA): N=1	Not reported	1) AC 2) TAU 3) Non-directed play control	Jadad Score (1996)	Nothing reported	Nothing reported
9	Uman et al. (2013) Canada	Update of Uman et al. (2006)	RCTs on different interventions including hypnosis	Children/ adolescents only	5 + 2 (update)	Update: 59 in total: 255	1987 - 2009	English	Update: Greece: N=1 France: N=1	Cochrane Central Register of Controlled Trials (CENTRAL), Medline, PsycINFO, Excerpta Medica dataBASE (EMBASE), Cumulative Index to Nursing and Allied Health Literature (CINAHL), and Web of Science	March 20, 2013	Needle-related procedures	Update: Local dental anesthetic: N=1 Venepuncture: N=1	Update: 5-16	Not reported	Hypnosis or any type of distraction (defined in the same manner Uman et al., 2006) alone or in combination with one other psychological intervention	Hypnosis (three-step Ericksonian procedure via hypnotherapist): N=1 Hypnosis (+ EMLA) vs. Attention control (+ EMLA): N=1	Not reported	1) AC 2) TAU 3) Non-directed play control	Cochrane RoB tool	Nothing reported	Discussed that younger children might have a higher level of hypnotizability, but not tested specifically
10	Birnie et al. (2018) Canada	Update of Uman et al. (2013)	RCTs on different interventions including hypnosis	Children/ adolescents only	7 + 1 (update)	Update: 40 in total: 295	1987 - 2017	English	Update: Mexico: N=1	Cochrane Central Register of Controlled Trials (CENTRAL); MEDLINE; PsycINFO; Embase; Web of Science; Cumulative Index to Nursing and Allied Health Literature (CINAHL) + Pain in Child Health (PICH); Pediatric Pain; American Psychological Association’s Society of Pediatric Psychology Division 54; American Psychological Association’s Health Psychology Division 38 + clinicaltrials.gov; and World Heal…	2017-09-01	Needle-related procedures	Bone marrow aspirations, lumbar punctures, venipuncture, or local dental anesthetic Update: dental anesthetic: N=1 in total: Local dental anesthetic: N=2 Venepuncture: N=1 Bone marrow aspiration: N=3 Lumbar puncture: N=2	Update: 5-9	Update: 60%	Not specified	Update: classic directive hypnosis intervention through headphones: N=1 in total: Hypnosis (three-step Ericksonian procedure via hypnotherapist): N=1 Training in hypnosis and self-hypnosis from psychologist: N=1 Therapist taught hypnotic suggestion using the child’s favorite story: N=1 Hypnosis through visual imagery and analgesic suggestion, relaxation techniques: N=1 Direct (analgesic hypnotic …	Update: 3min PMR + 5min "deepening procedure": N=1	Update: TAU + wearing headphones to block the sound of the dental drill	Cochrane RoB tool (Higgins 2017)	No adverse events were reported for hypnosis subgroup	Discussed that younger children might have a higher level of hypnotizability, but not tested specifically
11	Provencal et al. (2018) Canada		RCTs on hypnosis only	Adults only	6	234	1993 - 2007	English	Autralia: N=1 Belgium: N=1 Not reported: N=4	Medline, PsychINFO, CINAHL, Embase, ISI, SCOPUS, Cochrane, and Proquest databases	2014-08-18	Patients undergoing burn wound care	Hospitalized hospitalized adolescents and adults Total Body Surface Area burned ranged from 1-45%	16 - 65	Not reported	Hypnosis in the management of pain and anxiety during burn wound care in adult burn patients	Hypnosis based on Barber’s RIA, modified for wound debridement, with posthypnotic cues for comfort during subsequent dressing change (25min): N=3 Standard script specific for burn wound care, based on RIA, plus tape with hypnotic induction followed by music: N=1 Eye fixation, muscle relaxation and permissive suggestions. Pleasant memory, transforming sensations and dissociation from pain: N=1 15m…	25 min duration: N=3 15 min: N=1 Not reported: N=2	1) TAU 2) AC 3) Medication 4) Stress reducing strategies 5) Attention and information	Cochrane RoB tool	Nothing reported	Only one study included a measure of hypnotizability (Stanford Hypnotizability Scale)
12	Scheffler et al. (2018) Germany		RCTs on different interventions including hypnosis	Adults only	6	213	1992 - 2007	English	Not reported	MEDLINE, Web of Science, and PsycINFO	May 2016	Patients undergoing burn wound care	Not specified	Not reported	Not reported	Non-pharmacological interventions to adult patients (mean age of the study sample > 21years) undergoing burn wound care	Hypnosis (RIA= rapid induced analgesia) before wound debridement with posthypnotic suggestions and cues for comfort and relaxation during their subsequent dressing chance. Cues anchored by the psychologist touching the subjects shoulder or forehead. Patients should remember the connected suggestions later during the wound debridement when they are touched in a similar manner: N=2 Hypnosis (RIA) b…	Not reported	1) TAU 2) AC (information + relaxation)	Cochrane RoB tool	Nothing reported	Nothing reported
Labor and childbirth
13	Madden et al. (2012) Australia / UK		RCTs on different interventions including hypnosis	Adults only	7	1213	1969 - 2011	English	USA: N=5 UK: N=1 Australia: N=1	CENTRAL, MEDLINE, Embase, +BioMed Central +handsearch	2012-01-11	Labor and childbirth	Nulliparous and multiparous women: N=5 Only nulliparous women: N=2 Women aged 18 years or younger: N=1	Not reported	1	Preparation for Labor using hypnosis and/or use of hypnosis during Labor, with or without concurrent use of pharmacological or non-pharmacological pain relief methods	Antenatal hypnosis training in groups N=3 Antenatal hypnosis training in individual consultation N=3 Hypnosis during Labor: N=1 Life hypnosis by hypnotherapist/ nurse + CD-audio-recording for home practice: N=2	8 weekly sessions: N=1 6 weekly sessions: N=1 3 weekly sessions: N=1 4 intervention sessions spanning approx. 8 weeks N=1 Attendance as often as desired: N=1 During Labor N=1 (on average 20min duration) Not reported: N=1	1) TAU 2) AC (relaxation, supportive counselling, supportive psychotherapy)	Cochrane RoB tool 2.0	Two studies reported data on any other adverse events (maternal side effects, newborn resuscitation) but did not find any significant differences between hypnosis and control group.	Maternal hypnotisability (high versus low) considered as subgroup analysis. Two studies reported outcomes stratified for hypnotisability, no significant differences appeared.
14	Madden et al. (2016) Australia / UK	Update of Madden et al. (2012)	RCTs on different interventions including hypnosis	Adults only	7 + 2(update)	1741	update: 2011 - 2015	English	Update: UK: N=1 Denmark: N=1	CENTRAL, MEDLINE, Embase, +CINAHL +BioMed Central +handsearch	2015-09-30	Labor and childbirth	Update: only nulliparous women: N=2	Not reported	1	Preparation for Labor using hypnosis and/or use of hypnosis during Labor, with or without concurrent use of pharmacological or non-pharmacological pain relief methods	Update: antenatal hypnosis training in groups: N=2 Life hypnosis by hypnotherapist/ nurse + CD-audio-recording for home practice (N=2)	Update: Two 90-minute intervention sessions at approximately 32 weeks' and 35 weeks' gestation: N=1 3 weekly sessions: N=1	1) TAU 2) supportive counselling 3) relaxation training	Cochrane RoB tool 2.0	Three studies reported data on any other adverse events (maternal side effects, newborn resuscitation) but did not find any significant differences between hypnosis and control group.	Same as Madden et al. (2012)
15	Cyna et al. (2004) Australia		Studies on hypnosis including RCTs	Adults only	3	142	1969 - 2001	English	USA: N=3 UK: N=1	Medline, Embase, Pubmed, and the Cochrane library	March 2004	Childbirth	Pregnant women	Not reported	1	Hypnosis at any time during pregnancy and childbirth	Standard script used in Labor for individual patients including relaxation, focused attention, self-hypnosis prompts and glove/abdominal anesthesia: N=1 Individual weekly sessions from 32 weeks gestation with suggestions for relaxation and analgesia: N=1 Groups of 15, six sessions in total. Live induction at first session with tape made for daily home practice. Suggestions for relaxation and anal…	Not reported	1) TAU 2) Placebo 3) Active control	Quality score by Kleijnen et al. (1994)	None of the reviewed trials reports adverse effects attributed to the hypnosis intervention	2 of 5 studies considered hypnotizability and reported significant larger effects in patients with greater hypnotizability
16	Smith et al. (2003) Australia		RCTs on different interventions including hypnosis	Adolescents and adults	3	167	1986 - 2001	English	UK: N=1 USA: N=2	Cochrane Pregnancy and Childbirth Group trials register (July 2002), the Cochrane Controlled Trials Register (The Cochrane Library Issue 2, 2002), MEDLINE (1966 to July 2002), EMBASE (1980 to July 2002) and CINAHL (1980 to July 2002)	July 9, 2002	Labor	Primiparous or multiparous women in spontaneous or induced Labor in the first and second stage of Labor	Teenagers (18 or younger): N=1 18 - 35: N=1 NA: N=1	1	Complementary and alternative therapies for pain management in Labor	Individual hypnosis (imagination of warmth in one hand and shown how to transfer this to the abdomen): N=1 Self-hypnosis in group (live hypnotic induction during session one and taped hypnotic induction at the start of sessions two to six): N=1 Individual self-hypnosis: N=1	32 weekly sessions: N=1 6 x 60min weekly sessions: N=1 4 sessions over 8 weeks: N=1	1) TAU 2) Standard relaxation, distraction, breathing techniques 3) Supportive counselling	Cochrane RoB tool (2000)	"One trial reported an increased duration of labour among women receiving hypnosis. There was no evidence of any adverse effects on the neonate."	Nothing reported
17	Smith et al. (2006) Australia	Update of Smith et al. (2003)	RCTs on different interventions including hypnosis	Adolescents and adults	3 + 2 (update)	167 + 560	1969 - 2004	English	UK: N=1 USA: N=2 + 2	Cochrane Pregnancy and Childbirth Group's Trials Register (February 2006), the Cochrane Central Register of Controlled Trials (The Cochrane Library 2006, Issue 1), MEDLINE (1966 to February 2006), EMBASE (1980 to February 2006) and CINAHL (1980 to February 2006).	February 2006	Labor	Primiparous or multiparous women in spontaneous or induced Labor in the first and second stage of Labor	Not reported	1	Complementary and alternative therapies used in Labor (but not biofeedback) with or without concurrent use of pharmacological or non-pharmacological interventions	Hypnosis (cheek method) involving problem solving, brief psychoanalytical-based psychotherapy: N=1 Face-to-face with standard script (also relaxation, focused attention, self-hypnosis prompts and glove/abdominal anaesteasia included): N=1	5 sessions: N=1 Not reported: N=1	1) Supportive psychotherapy 2) TAU	Cochrane RoB tool (2000)	"There was no evidence of any adverse eIects on the mother or neonate"	Nothing reported
Pain
18	Langlois et al. (2022) France / Canada / Belgium		RCTs on hypnosis only	Adults only	9	530	2002 - 2020	English	Not reported	MEDLINE, Scopus, PEDro, CINAHL and The Cochrane Library	2021-05-13	Patients with chronic musculoskeletal and neuropathic pain	Chronic musculoskeletal and/or neuropathic pain such as chronic back pain: N=4 Osteoarthritis: N=2 Multiple sclerosis: N=3 Brachial neuralgia: N=1 Spinal cord injury pain: N=2 Hemarthrosis/heamatomas: N=1 Several types of chronic musculoskeletal and/or neuropathic pain: N=5 Only one pathology: N=4	34 - 81	Not reported	Hypnosis treatment including suggestions that a patient experiences changes in sensations, perceptions, thoughts, or behavior either delivered by a therapist trained in clinical hypnosis and/or administred as a self-hypnosis treatment with or without audio-tape recording, without any combination with another practice (e.g., massage, relaxation, etc.)	In person: N=9 (afterwards self-hypnosis via audiotape: N=4)	3 to 12 weeks (3 to 10 sessions); 30 - 90 min (in 7 studies, 2 not reported)	1) No intervention 2) TAU 3) Relaxation 4) Massage 5) Acupressure 6) Biofeedback 7) Pain education 8) Cognitive therapy	Cochrane RoB tool 2.0	Nothing reported	The 9 RCTs included in this review did not discriminate, with regard to pain relief, between high and low hypnotic suggestibility patients.
19	Garland et al. (2020) USA		RCTs on different interventions including hypnosis	Adults only	23 (k=25)	2195 (932 in meta-analysis)	1974 - 2017	English	Not reported	MEDLINE, Embase, Emcare, CINAHL, PsycINFO, and Cochrane Library	March 2018	Patients with clinical pain	Acute, procedural, or cancer pain Cardiac surgery: N=2 Burn Pain: N=4 Dental surgery: N=2 Elective plastic surgery: N=1 Hospital inpatients reporting intolerable pain or inadequate pain control: N=1 Postoperative pain and analgesic use: N=1 Interventional radiology procedures: N=1 Arterial, venous and renal surgery: N=1 Percutaneous tumor treatment: N=1 Outpatient third molar extraction: N=2 Surg…	Not reported	Not reported	Psychologically oriented mind-body therapies (MBT) that prioritize usingmental techniques to ameliorate pain, including meditation, hypnosis, guided imagery, relaxation, therapeutic suggestion, and cognitive behavioral therapy; studies of physical mind-body modalities or other complementary therapies only if 50% or more of the intervention involved delivery of psychologically oriented MBT techniq…	Self-hypnosis training (face-to-face): N=1 Single time face-to-face hypnosis: N=10 Multiple session hypnosis (face-to-face): N=2 Single session hypnosis (recording): N=3 Hypnosis + placebo/lorazepam: N=1 Hypnotic suggestions/ mindfulness training: N=1 Hypnosis + music + intravenous sedation (via audiotape recording): N=2 Virtual reality hypnosis: N=1 Multiple sessions hypnosis / CBT coping skills…	Not reported	1) TAU 2) AC 3) Virtual reality (VR) distraction 4) Music + IV sedation 5) Stress reduction 6) Pain education 7) Psychological intervention + placebo/ lorazepam	Cochrane RoB tool	Nothing reported	Nothing reported
20	Milling et al. (2021) USA		Studies on hypnosis including RCTs	Not reported	42 (32 RCTs)	1409	1983 - 2017	English	Not reported	PsycINFO and PubMed	2019-04-01	Patients with clinical pain	Not reported	Not reported	Not reported	Hypnosis for relieving clinical pain ; studies were not included if the primary goal was the use of hypnosis to treat other problems (e.g., emotional distress) and when hypnosis was utilized to reduce experimental pain	Direct suggestions for pain reduction Pleasant or distracting imagery Relaxation Ego-strengthening	Not reported	1) TAU 2) AC 3) Waitlist 4) No treatment	Cochrane RoB tool (Higgins et al. 2011)	Nothing reported	6 of 32 studies used suggestibility measures; "Hypnosis was also moderated by hypnotic suggestibility, with 6 post trials producing a mean weighted effect size of r = 0.53 (p ≤ .001)"
21	Zech et al. (2017) Germany		RCTs on different interventions including hypnosis	Adults only	3	134	1991 - 2013	English	Spain: N=2 Netherlands: N=1 France: N=1 Italy: N=1	Cochrane Library, MEDLINE, PsycINFO and SCOPUS	February 2016	Fibromyalgia	Clinical diagnosis of fibromyalgia	Not reported	Not reported	Hypnosis/guided imagery for treatment in fibromyalgia	Traditional hypnosis with CBT: N=2 Traditional hypnosis: N=1 Tailored hypnosis: N=1 Ericksonian hypnosis: N=1	12 x 90min sessions in 12 weeks: N=1 14 x 120min sessions in 14 weeks: N=1 8 x 60min sessions in 12 weeks: N=1 5 x 60min sessions in 6 weeks: N=1 Not reported: N=1	1) Cognitive behavioral therapy (CBT) 2) Physiotherapy 3) Waitlist 4) Autogenic training	Cochrane RoB tool	Nothing reported	1 of 3 studies tested hypnotizability of the participants; no further information
Cancer
22	Richardson et al. (2007) UK		RCTs on hypnosis only	Children/ adolsecents and adults	6 (4 included in meta-analysis)	180 (149 in meta-analysis)	1984 - 1995	English	USA: N=5 Greece: N=1	MEDLINE, EMBASE, PsycINFO, CINAHL, Cochrane Library, AMED, CISCOM, + Cochrane Complementary Field Registry	March 2005	Cancer patients with chemotherapy-induced nausea and vomiting	Paediatric outpatients undergoing chemotherapy with severe anticipatory nausea and vomiting: N=1 Newly diagnosed paediatric cancer patients undergoing chemotherapy: N=1 Adult cancer patients with haematologic lymphoma about to receive a bone marrow transplant: N=1 Paediatric cancer patients with chemotherapy related nausea and vomiting: N=2 Paediatric patients undergoing chemotherapy with trouble…	Children (5-18 years): N=5 Adults (19-49 years): N=1	Not reported	Any intervention defined by the study investigators as ‘hypnosis’ or ‘hypnotherapy’ that involved both ‘induction’ and ‘suggestion’	Individual: N=5 Individual + audio-tape: N=1	60min pre-admission + 20min post-admission: N=1 2-3 x 45min: N=1 2 x 90min (outpatient training) + 10 x 30min twice weekly after admission: N=1 15-30min: N=1 30-40min: N=2	1) TAU 2) AC 3) Cognitive coping 4) Distraction 5) Supportive therapy	Not reported	Nothing reported	Hypnotizability was only assessed in one study
23	Danon et al. (2021) Switzerland		RCTs on different interventions including hypnosis	Adults only	4 (3 included in meta-analysis)	255 (130 in meta-analysis)	1982 - 2017	English	USA: N=3 Germany: N=1	MEDLINE, Embase, PubMed, PsychInfo, PsycArticles, CINAHL, Cochrane Central Register of Controlled Trials (CENTRAL), Science Citation Index, Web of Science, Google Scholar, Clinicaltrials. gov, and WHO International Clinical Trials Registry Platform	May 2020	Cancer-related pain	Primary carcinoma of the breast and documented metastases: N=1 Routine cancer patients in a multidisciplinary pain unit: N=1 Metastatic or locally recurrent breast cancer: N=1 Patiens diagnosed with cancer: N=1	54: N=1 52.7: N=1 60.95: N=1 Not reported: N=1	100%: N=2 89%: N=1 Not reported: N=1	Mind-body techniques for cancer‐related pain occurring during or after specific cancer treatment: meditation, mindfulness, qigong, hypnosis, autogenic training, suggestion, guided imagery, relaxation therapy, tai ji, and yoga	Hypnosis + supportive-expressive therapy + education in groups: N=1 Instructions for self-hypnosis + pharmacological treatment: N=1 Self-hypnosis training: N=1 Valencia model of waking hypnosis with CBT: N=1	90min sessions for several times a day for 1 year: N=1 2 periods of 4 weeks: N=1 5-10min of each self hypnosis exercise: N=1 4 sessions of 60min each: N=1	1) TAU 2) Waitlist 3) No treatment 4) Active control 5) Pharmacological treatment alone education alone	Cochrane RoB tool (Higgins et al. 2011)	No study reported any data on adverse effects	Nothing reported
24	Jong et al. (2020) Sweden		RCTs on different interventions including hypnosis	Children/ adolescents only	5 (4 included in meta-analysis)	233 (206 in meta-analysis)	1987 - 2009	English	USA: N=2 Greece: N=3	PubMed, EMBASE, Cochrane, CINAHL	March 2016	Children with cancer	Acute lymphoblastic leukemia: N=1 Hematology and oncology diagnoses: N=1 Leukemia or non-Hodgkin lymphoma: N=2 Venipuncture in cancer: N=1	3 - 16	Not reported	Any Complementary and Alternative Medicine (CAM) intervention (as defined by the National Center for Complementary and Alternative Medicine)	Hypnotic induction, active imagery, individually tailored, deep muscle relaxation, and suggestions, ending with a post-hypnotic suggestion: N=1 Hypnosis with favorite place hypnotic induction, both parents and children were taught the exercises: N=1 Indirect hypnosis using metaphors, imagination using various senses, develop cues to experience immediate relaxation, and ways to adapt to discomfort…	Not reported	1) AC 2) Distraction 3) TAU	According to the GRADE handbook	No evidence for side effects	Hypnotizability tested in 3 of 4 studies; higher level of hypnotizability associated with increased treatment benefit
25	Nunns et al. (2018) UK		RCTs on different interventions including hypnosis	Children/ adolescents only	8 (6 included in meta-analysis)	337 (287 in meta-analysis)	1984 - 2009	English	Greece: N=4 USA: N=3 Canada: N=1	MEDLINE, EMBASE, PsycINFO, CENTRAL, HTA, CINAHL, Web of Science, British Nursing Index	July 2017	Patients undergoing treatment for cancer	Leukaemia: N=2 Leukaemia or non-Hodgkin's lymphona: N=2 Leukaemia, non-Hodgkin's lymphona, neutral tumor: N=1 All kinds of cancer: N=1 Not reported: N=2	Not reported	Not reported	Non‐pharmacological intervention of any type targeting procedural anxiety	Hypnosis: N=8 Direct and indirect hypnotic suggestions: N=1 Imaginative involvement: N=1	2 x 30 min training session + 3 x 20 min preprocedural session, every 1-6 months: N=1 1 x 20 min preparation + 2 x during procedure, twice per year: N=1 3 x 30 min sessions: N=1 3 x 40 min sessions (+ 45 min self-hypnosis): N=1 4 x 40 min sessions (+ 45 min self-hypnosis): N=1 1 x 15 min session: N=1 2 sessions of unknown duration:N=1 1-6 sessions during procedure: N=1	1) Non-hypnosis intervention 2) TAU 3) AC 4) Active control (active cognitive strategy group, play)	Cochrane RoB tool (Higgins et al. 2011)	Adverse effects mentioned, but not further described	Nothing reported
26	Chen et al. (2017) Taiwan		Studies on hypnosis including RCTs	Children/ adolescents and adults	13	771	1982 - 2012	English	USA: N=7 UK: N=5 Netherlands: N=1	Scopus, Medline Ovidsp, PubMed, PsycInfo–Ovid, Academic Search Premier, CINAHL Plus with FT-EBSCO, and SDOL	May 2015	Cancer	Breast cancer: N=2 Leukemia: N=2 Hepatic malignancies: N=1 Hematological malignancy: N=2 Leukemia & non-Hodgkin disease: N=2 Solid tumor: N=1 Mixed: N=2 Unclear: N=1	Adults (25-87 years): N=11 Pediatric patients (5-20 years): N=9	Not reported	Hypnosis targeting anxiety in cancer patients (both children and adults)	Only delivered by therapist: N=5 Individual with therapist + self-hypnosis with audiotapes: N=3 Self-hypnosis by watching video and listening to audio file from a website: N=1 Self-hypnosis with hypnotic script read by research assistant: N=1 Individual with therapist + self-hypnosis with Gardner's model: N=3	5 weekly sessions à 50 min: N=1 3 times/week for 4 weeks (20 min sessions): N=1 3 sessions à 20 min: N=1 15 min per session: N=1 40-45 min per session: N=2 4 wekkly sessions à 30 min: N=1 2 sessions before the medical procedure à 30 min: N=1 Not reported: N=5	1) TAU 2) AC 3) Distraction 4) CBT	Not reported	Nothing reported	Discussed that most of the original studies did not measure hypnotizability
Irritable bowel syndrome
27	Ford et al. (2019) UK		RCTs on different interventions including hypnosis	Adults only	5	278	1998 - 2013	English	USA: N=1 Sweden: N=2 Austria: N=1	MEDLINE, EMBASE, and the Cochrane Controlled Trials Register	December 2013	Irritable bowel syndrome	Not specified	Not reported	Not reported	Psychological therapies	Gut-directed hypnotherapy (GDH): N=2 GDH + audiotapes: N=2	1 x 30 - 60 min session per week for 6 weeks: N=1 1 x 60 min session per week for 12 weeks: N=2 10 x 45 min sessions over 12 weeks: N=1	1) Active control 2) TAU	Cochrane RoB tool Version 5.0.2. (Higgins et al. 2009)	No adverse events / poorly reported among trials of psychological therapies	Nothing reported
28	Black et al. (2020) UK	Update of Ford et al. (2019)	RCTs on different interventions including hypnosis	Adults only	6	739	1998 - 2017	English	USA: N=1 Sweden: N=3 Netherlands: N=1 Austria: N=1	MEDLINE, EMBASE, Cochrane central register of controlled trials, + Digestive Disease Week, American College of Gastroenterology, United European Gastroenterology Week and the Asian Pacific Digestive Week	2020-01-01	Irritable bowel syndrome	Not specified	Not reported	Not reported	Psychological therapies	GDH in individual setting: N=6 GDH in groups: N=3	60 min session per weeks for 12 weeks: N=2 30-60 min sessions per week for 6 weeks: N=1 45 min session every 2 weeks for 12 weeks (individual) or 60 min session every 2 weeks for 12 weeks (in groups of 6): N=1 8 sessions over 12 weeks: N=1	1) Waitlist 2) Education	Cochrane RoB tool (Higgins et al. 2011)	No adverse events / not reported in sufficient detail	Nothing reported
29	Krouwel etal. (2021) UK		RCTs on hypnosis only	Adults only	7	723	2012 - 2019	English	Germany: N=1 Austria: N=1 UK: N=1 Holland: N=1 Sweden: N=2 Australia: N=1	CINAHL, Cochrane Library, Conference Citation Index, Embase, PubMed, PsycARTICLES, PsychINFO, Science Citation index-expanded, Social Science Citation Index	2020-04-27	Irritable bowel syndrome	Diagnosis of IBS using one of the prevailing diagnostic criteria at the time (Manning22 or Rome IIV)	18 - 65	63.3 - 86.3%	Intervention including an element explicitly identified as hypnotherapy	Individual GDH: N=4 Group GDH: N=3 Integrative therapy including psychodynamics, GDH and education: N=1	12 sessions of 90min: N=1 (GGDH) 6 x 60min every two weeks: N=1 (IGDH) 6 x 45min every two weeks: N=1 (IGDH) 12 x 60min: N=2 (GGDH) 12 x 60min: N=1 (GGDH) 10 x 45min: N=1 (IGDH) 6 x 60min: N=1	1) Waitlist 2) Waitlist with active medical intervention 3) Enhanced medical care 4) Supportive therapy 5) Low FODMAP diet 6) Biofeedback	Cochrane RoB tool	Nothing reported	Nothing reported
30	Lee et al. (2014) Korea		RCTs on hypnosis only	Adults only	7	374	1984 - 2013	English	Austria: N=1 Sweden: N=2 UK: N=2 USA: N=2	MEDLINE (PubMed), Embase, PsycINFO and the Cochrane Central Register of Controlled Trials (CENTRAL database)	2013-01-15	Irritable bowel syndrome	Not specified	18 - 70	0.8	Hypnotherapy	GDH	5 to 12 sessions (30-60 min)	1) Any other conventional treatment 2) No treatment	Cochrane RoB tool	No adverse events were reported in any trial	Nothing reported
31	Schaefert et al. (2014) Germany / Austria		RCTs on hypnosis only	Adults only	8	464	1984 - 2006	English	Sweden: N=3 USA: N=2 Austria: N=1 UK: N=2	AMED, CENTRAL, CINAHL, PubMed, PsycINFO, Scopus	2013-06-30	Irritable bowel syndrome	Diagnosis of IBS (ROME I, II or III criteria), refractory tp conventional treatment/standard dietary and pharmacological therapies	Adults	Not reported	Hypnosis	Manchester approach: N=6 GDH: N=2 Group GDH: N=1 Individual: N=7	12 x 30-60 min over 3 months: N=3 7 x 60 min over 3mo.: N=1 10 x 45 min over 3mo.: N=1 7 x 45 min over 3mo.: N=1 5 x 30 min over 5 weeks: N=1 7 x 30 min over 3 mo.: N=1 in total 7-12 sessions in 5-12 weeks total duration: 2.5-12h	1) Education 2) Supportive therapy 3) TAU 4) Waitlist	Cochrane RoB tool	Considered safety (dropout due to adverse events) as primary outcome. Three studies did not report on adverse events. One study reported that one patient complained of slight dizziness after the first session but continued the therapy. Another study reported one dropout due to panic attack during hypnosis session. The other three studies reported that no adverse events were observed	Nothing reported
32	Henrich et al. (2015) UK		RCTs on different interventions including hypnosis	Adults only	5	255	1998 - 2012	English	USA: N=2 UK: N=1 Sweden: N=2	PubMed, PsycInfo, Web of Science, Google Scholar and Science Direct	May 2013	Irritable bowel syndrome	Not specified	Not reported	Not reported	Non-invasive psychological intervention	GDH: N=5	12 x 45 min: N=1 12 x 60 min: N=2 7 x 45 min: N=1 5 x 30 min: N=1	1) TAU 2) Supportive therapy 3) Symptom monitoring 4) Waitlist	Cochrane RoB tool	No adverse events	Nothing reported
33	Laird et al. (2016) USA		RCTs on different interventions including hypnosis	Adults only	5	253	2002 - 2012	English	USA: N=2 Austria: N=1 Sweden: N=2	PubMed, PsycINFO, Science Direct, and ProQuest Dissertations and Theses	2015-08-15	Irritable bowel syndrome	Not specified	Not reported	Not reported	Psychological intervention	Individual: N=4 In group: N=1	12 sessions: N=2 10 sessions: N=1 7 sessions: N=1 5 sessions: N=1	Not reported	Cochrane RoB tool	Nothing reported	Nothing reported
34	Laird et al. (2017) USA		RCTs on different interventions including hypnosis	Adults only	4	223	2006 - 2013	English	Sweden: N=1 Austria: N=1 UK: N=1	PubMed, PsycINFO, Science Direct, and ProQuest Dissertations and Theses	2015-08-15	Irritable bowel syndrome	Not specified	Not reported	Not reported	Psychological intervention	Individual: N=3 In group: N=1	12 sessions: N=2 10 sessions: N=1 5 sessions: N=1	Not reported	Cochrane RoB tool	Nothing reported	Nothing reported
35	Peng et al. (2021) China		RCTs on different interventions including hypnosis	Adults only	11	509	1984 - 2017	English	UK: N=6 Sweden: N=4 Austria: N=1	OVID Medline, Embase and Cochrane	2020-09-01	Irritable bowel syndrome	Not specified	Not reported	Not reported	Pharmacological (standard medical treatment and guideline recommended medications) or nonpharmacological treatments (hypnotherapy, cognitive-behavioral therapy, biofeedback, symptom monitoring modalities, or natural living products)	Individual GDH: N=4 GDH + supportive talks: N=1 General hypnotherapy: N=3 Group hypnotherapy: N=1	7 sessions: N=1 8 sessions: N=1 4 sessions over 7 weeks: N=1 6 sessions ofer 12 weeks: N=1 1 hour per week for 12 weeks: N=1 5 sessions approx. once per week: N=1 12 sessions over 12 weeks: N=2 5 sessions in 5 weeks: N=1 3 sessions over 12 weeks: N=1 10 sessions over 12 weeks: N=1	1) Supportive talks with medical treatment 2) TAU 3) Waitlist 4) Supportive therapy (dietary advice, info relaxation, education, general support) 5) Placebo pills + psychotherapy 6) Biofeedback	Cochrane RoB tool	Nothing reported	Nothing reported
36	Shah et al. (2020) USA		RCTs on different interventions including hypnosis	Adults only	6	Not reported	Not reported	English	Not reported	Ovid –Medline database, psycLIT, Ebscohost (the Rutgers Library Database), and Google Scholar	NA	Irritable bowel syndrome	Not specified	Not reported	Not reported	Mind-body therapy	Not reported	Not reported	Not reported	Cochrane RoB tool	Nothing reported	Nothing reported
Obesity
37	Milling et al. (2018) USA		Studies on hypnosis including RCTs	Adolescents and adults	(A) 10 (k=14) (B) 12 (k=13)	(A) 882 (B) 573	1980 - 2013	English	Not reported	PsycINFO and PubMed	December 2016	Obesity	Not specified	Not reported	Not reported	Intervention incorporating hypnosis	(A) Self-hypnosis: N=7 Hypnosis alone: N=9 Hypnosis + CBT: N=5 (B) Hypnosis + self-hypnosis + CBT: N=9 Hypnosis + CBT: N=3	Not reported	1) TAU 2) AC 3) No treatment 4) CBT alone (vs. Hypnosis+CBT)	Cochrane RoB tool	Nothing reported	Hypnoziability measured in 9 of 12 trials; effect size of 0.26 when hypnotizability was measured prior to treatment vs. effect size of 1.28 when not
Smoking cessation
38	Barnes et al. (2010) New Zealand / UK		RCTs on hypnosis only	Adults only	11	1221	1977 - 2008	English	USA: N=5 Canada: N=4 UK: N=1 Australia: N=1	Cochrane Tobacco Addiction Group Specialized Register, MEDLINE, EMBASE, AMED, SCI, SSCI	July 2010	Smoking cessation	Smoking cessation rates longer than 6 months after treatment 20-40 cigarettes per day	30 - 40	Not reported (more female than male)	Hypnotherapy intervention for smoking cessation	Group: N=5 Face-to-face: N=2 Face-to-face + audiotape: N=3	7 x 60 min sessions over 2 weeks: N=1 2 x 60 min + 3 x 20 min follow-up (telephone counselling) a week over 2 months: N=1 8 x 60 min + audiotape for daily practice: N=1 60 min once a week for 4 weeks: N=1 2 x 40 min (2 weeks apart) + instructions for self-hypnosis: N=1 1 x 90 min: N=2 6 x weekly sessions: N=1 1 x 30 min + suggested autohypnosis: N=1 1 x 150 min in group: N=1 Not reported: N=1 Tot…	1) Waitlist 2) AC (e.g., anti-smoking advice group) 3) Non-specific psychological treatments 4) Combination of matched duration psychological treatment, nicotine patch and counselling follow-up calls 5) Rapid/focused smoking 6) Fenfluramine 7) Placebo 8) Self-help materials and supportive calls 9) Counselling	Cochrane RoB tool	No study reported any adverse events	Nothing reported
39	Barnes et al. (2019) New Zealand / UK	Update of Barnes et al. (2010)	RCTs on hypnosis only	Adults only	11 + 3 (update)	Update: 705	Update: 2013-2014	English	Update: USA: N=1 Germany: N=1 Switzerland: N=1	Cochrane Tobacco Addiction Group Specialized Register, ClinicalTrials.gov, and the WHO International Clinical Trials Registry Platform	2018-07-18	Smoking cessation	20-40 cigarettes a day + wish to stop	30 - 40	Not reported (more female than male)	Hypnotherapy intervention for smoking cessation	Update: Group: N=2 Individual: N=1 Group + audiotape: N=1	Update: 1 x 90 min: N=1 1 x 90min per week for 6 weeks: N=1 Not reported: N=1	Update: 1) Nicotine-replacement-therapy 2) Relaxation 3) CBT	Cochrane RoB tool	Dickson-Spillmann 2013 reported AE data for one of the two data collection points (two-week follow-up); there was no statistically significant difference in the AE ‘index’ between the hypnosis and relaxation groups. Barkley 1977 did not describe how AE data were collected, but reported the number of participants in the rapid smoking group who had vomited. Reports of the other 12 studies did not p…	Nothing reported
40	Tahiri et al. (2012) Canada		RCTs on different interventions including hypnosis	Adults only	4	273	1979 - 2006	English	USA: N=3 Canada: N=1	Cochrane Library, EMBASE, Medline, and PsycINFO	December 2010	Smoking cessation	Not specified	35.6: N=1 41.7: N=1 42.7: N=1 Not reported: N=1	68.5%: N=1 48.7%: N=1 56.9%: N=1 70%: N=1	Alternative smoking cessation aids: acupuncture, hypnotherapy, and aversive smoking	Delivered by hypnotherapist: N=2 Delivered by trained family physician: N=1 Delivered by trained psychologist: N=1	1 x 150 min session: N=1 1 session: N=1 2 x 40 min sessions: N=1 8 x 60 min sessions: N=1	1) Waitlist 2) Information	Cochrane RoB tool	Nothing reported	Nothing reported
41	Hartmann-Boyce et al. (2021) UK	Includes all primary studies of Barnes et al. (2019)	RCTs on different interventions including hypnosis	Adults only	14	1926	1977 - 2014	English	USA: N=6 Canada: N=4 UK: N=1 Australia: N=1 Germany: N=1 Switzerland: N=1	Cochrane Database of Systematic Reviews (CDSR)	July 2020	Smoking cessation	Not specified	30 - 40	Not reported	Behavioural therapies for smoking cessation, delivered at the individual or group level	Group: N=7 Individual: N=3 Face-to-face + audiotape: N=4	7 x 60 min sessions over 2 weeks: N=1 2 x 60 min + 3 x 20min follow-up (telephone counselling) a week over 2 months: N=1 8 x 60 min + audiotape for daily practice: N=1 60 min once a week for 4 weeks: N=1 2 x 40 min (2 weeks apart) + instructions for self-hypnosis: N=1 1 x 90 min: N=2 6 x weekly sessions: N=1 1 x 30 min + suggested autohypnosis: N=1 1 x 150 min in group: N=1 1 x 90 min: N=1 1 x 90…	1) Waitlist 2) AC 3) CBT 4) Placebo 5) No treatment 6) Behavioural counselling	Cochrane RoB tool	No evidence for adverse effects or harms from behavioural interventions	Nothing reported
Symptoms of mental/psychosomatic disorders
42	Shih et al. (2009) Taiwan		RCTs on hypnosis only	Adults only	6	258	1983 - 2006	Englisch, Japanese, Chinese	South Africa: N=1 China: N=1 Japan: N=1 UK: N=1 US: N=2	Google Scholar, PubMed, Cochrane Library, PsiTri, PsychLit, Embase, the Cochrane Depression, Anxiety and Neurosis Review Group (CCDAN)	NA	Depressive symptoms	First time mothers: N=1 Patiens with uterine cervix cancer: N=1 Undergraduate students: N=1 Patients with far-advanced cancer: N=1 Volunteers recruited from the community: N=1 Adults scrored >13 (mild depression) in BDI: N=1	18 - 81	67.5%	Hypnotic intervention intended to reduce depressive symptoms	Individual: N=5 Group: N=1 Face-to-face: N=4 Audio-tape: N=1 Both: N=1	Weekly hypnosis sessions; each 30-40 min for 6 weeks: N=1 60 min sessions of self-hypnosis daily for 14 perioperative days: N=1 Weekly hypnosis sessions for 2 weeks: N=1 Weekly hypnosis sessions each lasted 30 min for 6 months: N=1 Biweekly group hypnosis sessions using audiotape: N=1 Daily self-administration of 30 min audiotape recording containing verbal suggestions to enter a hypnotic state f…	1) No treatment 2) TAU	Jadad et al. (1996)	Discussed that hypnosis has only minimal adverse effects if practiced as recommended	Nothing reported
43	O'Toole et al. (2016) USA		Studies on hypnosis including RCTs	Children/ adolescents and adults	3	94	1989 - 2009	English	Bali, Israel, the Netherlands, and Iran	PsycINFO, Medline	NA	Symptoms of posttraumatic stress disorder	Military (e.g., war or terrorism) and nonmilitary-related trauma victims	Adults and preadolescents	0%: N=1 79%: N=1 53%: N=1	Hypnotherapy or hypnotherapeutic techniques	Hypnotherapy and "spiritual hypnosis-assisted therapy"	Not reported	1) Zolpidem 2) Waitlist 3) No Treatment	Not reported	Nothing reported	Nothing reported
44	Rotaru & Rusu (2016) Romania		Studies on hypnosis including RCTs	Children/ adolescents and adults	4	144	1989 - 2013	English	Israel: N=1 USA: N=2 Netherlands: N=1	PILOTS: Published International Literature on Traumatic Stress, ProQuest Central, PsycINFO, PubMed Central	2014-01-01	Posttraumatic stress disorder	PTSD-diagnosed patients Combat related: N=1 Violent crime/traffic accident/bereavement related: N=1 Not specified: N=2	31.7: N=1 29.2: N=1 42: N=1 37.75: N=1	0%: N=1 56%: N=1 88%: N=1 66%: N=1	Hypnosis (combinations with other interventions were excluded)	Symptom-oriented hypnotherapy: N=1 Manualized abreactive ego state single-session therapy: N=1 Hypnotherapy with experienced clinicians and supervision: N=1 Manualized abreactive ego state single-session therapy: N=1	2 x 90 min session per week for 2 weeks: N=1 Not reported: N=3	1) Pharmacotherapy 2) Placebo 3) Waitlist	Downs and Black's (1998) checklist	Nothing reported	4 of 6 studies measured hypnotizability with Stanford Hypnotic Clinical Scale (SHCS) and The Hypnotic Induction Profile (HIP)
45	Flammer & Alladin (2007) Germany		RCTs on hypnosis only	Children/ adolescents and adults	21 (k=22)	843	1962 - 2005	English, German, French	Not reported	PsycLIT, Medline, and Dissertation Abstracts	NA	Psychosomatic disorders	Tinnitus: N=1 Insomnia: N=1 Functional dyspepsia: N=1 Duodenal ulcer: N=2 Enuresis: N=1 Asthma: N=3 IBS: N=1 Osteoarthritis: N=1 Chronic pain: N=2 Hayfever: N=1 Chronic headache: N=4 Conversion disorder: N=1 Atopic dermatitis: N=1 Hypertension: N=1	Children/adolescents and adults	Not reported	Hypnotic intervention with psychotherapeutic or medical indication for, e.g., hypnosis in the treatment of patients with disorders that could be coded according to ICD-10 + patients undergoing medical procedures (e.g., in dentistry, surgery, or cancer treatment)	Classical hypnosis: N=10 (consisted of direct suggestions for relaxation, for alleviation of symptoms, and for inducing imaginations or visualization, relaxation, and posthypnotic suggestions) Modern hypnosis: N=3 (indirect suggestions for relaxation, etc., metaphors, and age regression) Mixed form of hypnosis: N=5 (combinations of classical and modern hypnosis without any predominance of classic…	Not reported	1) Waitlist 2) No treatment	Not reported	Nothing reported	Suggestibility tested in 12 of 22 studies; validated test of suggestibility used in 11 of 22 studies. Numerical values for correlation between suggestibility and outcome were only reported in three studies (mean r=0.31)
46	Lam et al. (2015) China		RCTs on hypnosis only	Adults only	3	75	1973 - 2010	English	USA Australia Israel	PsycINFO,EMBASE, Medline, CINAHL PLUS, AMED, cochrane central regis-ter of controlled trials, applied social sciences index and abstracts,dissertation abstracts international and PsycARTICLES	2014-03-01	Insomnia	University students with insomnia: N=2 Patients with depression: N=1 Cancer survivors with insomnia: N=1 Volunteers with insomnia: N=1 Male combat veterans suffering from PTSD: N=1	45.2	52.8%	Hypnosis targeted at improving sleep	In-person individually: i=5 Delivered through the internet: i=1	4 to 6 weeks duration of sessions: 20 min-1.5 hours	1) Psychological interventions 2) Pharmacological or biological treatments 3) SHAM interventions 4) Waitlist	Modified Jadad scale, Cochrane RoB criteria	Only one study reported the incidence of adverse events. Among the 15 participants on zolpidem, one of them experienced drowsiness after the first dose and discontinued from study; while none of the 17 participants receiving hypnosis experienced adverse events.	4 of 6 studies did not report testing for hypnotic suggestibility. 1 study used the Harvard group scale of hypnotic susceptibility form A, 1 study used the Stanford hypnotic susceptibility scale form C
Various disorders
47	Ramondo et al. (2021) Australia		Studies on hypnosis including RCTs	Children/ adolescents and adults	39	1500	1971 - 2017	English	Not reported	Medline, ProQuest Central, psycINFO, PubMed Central, Scopus, Web of Science	2018-11-30	Various	Pain: N=1 Depression: N=4 Anxiety: N=10 Headache: N=3 Obesity: N=10 Insomnia: N=1 Acute Stress: N=1 Fibromylagia: N=3 Self Concept: N=1 Athletic Performance: N=3 Essential Hypertension: N=1 Duodenal Ulcer: N=1	Children/adolescents: N=2 Adults: N=37	Not reported	Cognitive-behavioral psychotherapy administered to at least one group of participants in a hypnotic context (CBTH) compared to the same therapy administered to at least one group of clients in a nonhypnotic context (CBT only)	Not reported	Not reported	e.g., no treatment, waitlist, AC, other therapies	Cochrane RoB tool (Higgins et al. 2011)	Nothing reported	Hypnotizability was outcome measure, but not further described; two treatments excluded a subgroup of the population (e.g., low and medium hypnotizable participants)
48	Flammer & Bongartz (2003) Germany		Studies on hypnosis including RCTs	Children/ adolescents and adults	57	2411	1982 - 2002	Not reported	Not reported	PsycInfo, MEDLINE	Not reported	Various	Tinnitus: N=1 Insomnia: N=1 Duodenal ulceration: N=1 Enuresis: N=1 Asthma: N=3 Warts: N=4 IBS: N=1 Chronic headaches: N=3 Hypertension: N=1 Recurrent headaches: N=1 Smoking cessation: N=7 Test anxiety: N=6 PTSD: N=1 Anxiety: N=1 Bypass surgery: N=3 Surgery: N=6 Labor: N=1 Osteoarthritis pain: N=1 Healing process of bone fractures: N=1 Local anestesia: N=1 Analgesia: N=3 Breast biopsy: N=1 Burn pa…	Children/adolescents: N=11 Grown ups: N=25 Mixed: N=6 Not reported: N=15	Male: N=4 Female: N=7 Mixed: N=41 NA: N=5	Hypnosis in the treatment of either patients with disorders coded according to ICD-10, or with patients undergoing medical procedures, or for treatment of warts	Classical hypnosis (direct suggestions for relaxation, imagination and for alleviation of symptoms): N=40 Modern hypnosis (indirect suggestions for relaxation, imagination or for symptom reduction, apply of metaphors, symbolizations): N=11 Undecidable: N=6	Mean duration: 3.7 weeks	Waitlist	Not reported	Nothing reported	"6 studies reported numerical values for the correlation between hypnotic suggestibility and treatment outcome with a mean correlation of r = .44"
49	Eason & Parris (2019) UK		RCTs on hypnosis only	Children/ adolescents and adults	17	4176	1986 - 2015	English	Not reported	Cochrane Library, MEDLINE, PsycINFO, PubMed, and Scopus databases	Not reported	Various	Pain: N=4 Multiple sclerosis: N=1 Invasive medical procedures: N=1 Obstetrics: N=4 Paediatric: N=2 Stress, anxiety, hypertension: N=3 Chronic tinnitus: N=1 Insomnia: N=1 Breast cancer: N=2 Hay fever: N=1 Immune response: N=1 Severe hemophilia: N=1 Asthma: N=1	Adults and children	Not reported	Self-hypnosis for a clinical issue that one would typically seek treatment for, relief from, or assistance with in a clinical or medical setting, or for which one might seek therapeutic assistance	Not reported	10 sessions + encouraged to practice alone daily: N=1 4 sessions + encouraged to practice alone daily: N=2 Single session: N=3 8 sessions + practice / 8 sessions / 2 sessions + practice: N=1 2 x 90 min sessions 2 weeks apart: N=1 6 sessions + daily practice with audio recordings: N=1 3 sessions via audio rec: N=2 3 sessions + self-practice: N=1 5 sessions + 2 self-practice sessions daily: N=1 4 s…	1) TAU 2) Waitlist 3) AC 4) Active control	Rosenthal (1991)	Nothing reported	Nothing reported
